# Supplementary material for: Novel Approach to Classify Plants Based on Metabolite-Content Similarity
Source: Hindawi journal article supplement (doi:10.1155/2017/5296729), 2017-01-01
Supplement: f1 [file 5296729.f1.pdf]

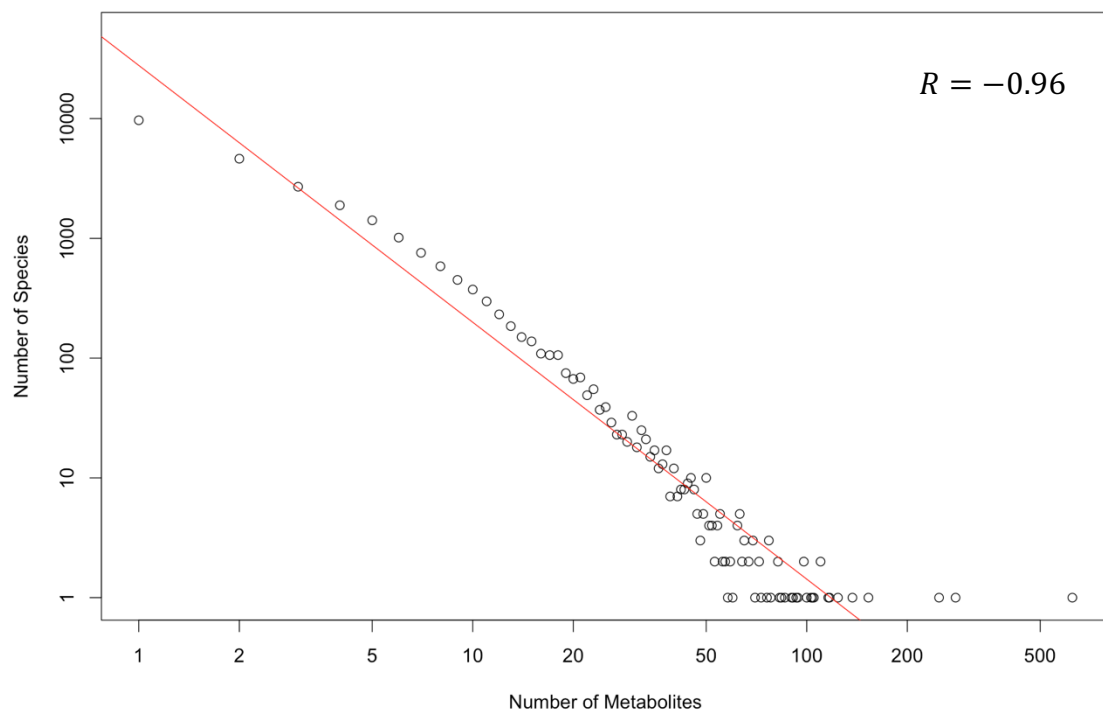

Supplementary Fig.1 The degree distribution of species in the species-metabolite bipartite graph. The x-axis represents the number of metabolites belonging to one species and the y-axis represents the frequency of such species.





Supplementary Table 1. The predicted unrecorded plant-metabolite relations, involving 524 metabolites and 117 plants.

| metabolite                             | plant                                                                                                                                                         |
|----------------------------------------|---------------------------------------------------------------------------------------------------------------------------------------------------------------|
| Gibberellin A4                         | <i>Citrus limon</i> ; <i>Phaseolus lunatus</i> ; <i>Nicotiana tabacum</i> ; <i>Lupinus luteus</i>                                                             |
| Methyl salicylate                      | <i>Citrus limon</i> ; <i>Citrus aurantifolia</i> ; <i>Citrus paradisi</i> ; <i>Citrus aurantium</i>                                                           |
| Cyclohexane                            | <i>Citrus limon</i> ; <i>Citrus aurantium</i> ; <i>Artemisia annua</i> ; <i>Artemisia capillaris</i> ; <i>Centaurea sessilis</i> ; <i>Zingiber officinale</i> |
| o-Isopropenyl toluene                  | <i>Citrus limon</i> ; <i>Citrus aurantifolia</i> ; <i>Citrus paradisi</i> ; <i>Citrus sinensis</i> ; <i>Citrus aurantium</i>                                  |
| Jasmonic acid                          | <i>Citrus limon</i>                                                                                                                                           |
| 10'-Apoviolaaxanthal                   | <i>Citrus limon</i>                                                                                                                                           |
| alpha-trans-Bergamotene                | <i>Citrus limon</i>                                                                                                                                           |
| Citral                                 | <i>Citrus aurantifolia</i> ; <i>Citrus paradisi</i> ; <i>Citrus reticulata</i>                                                                                |
| Benzeneacetaldehyde                    | <i>Citrus aurantifolia</i> ; <i>Citrus paradisi</i> ; <i>Citrus aurantium</i>                                                                                 |
| Methyl epijasmone                      | <i>Citrus aurantifolia</i> ; <i>Citrus sinensis</i>                                                                                                           |
| Salvigenin                             | <i>Citrus aurantifolia</i> ; <i>Citrus sinensis</i> ; <i>Citrus aurantium</i>                                                                                 |
| Rhoifolin                              | <i>Citrus paradisi</i>                                                                                                                                        |
| Isopropanol                            | <i>Citrus paradisi</i> ; <i>Citrus reticulata</i>                                                                                                             |
| Isoscutellarein 7,8-dimethyl ether     | <i>Citrus sinensis</i>                                                                                                                                        |
| Isoscutellarein 7,8,4'-trimethyl ether | <i>Citrus sinensis</i>                                                                                                                                        |
| Gibberellin A53                        | <i>Citrus sinensis</i> ; <i>Lathyrus odoratus</i> ; <i>Phaseolus lunatus</i> ; <i>Phaseolus coccineus</i> ; <i>Hordeum vulgare</i> ; <i>Nicotiana tabacum</i> |
| Violaxanthin                           | <i>Citrus sinensis</i>                                                                                                                                        |
| Gibberellin A81                        | <i>Citrus reticulata</i>                                                                                                                                      |
| Gibberellin A9                         | <i>Citrus reticulata</i>                                                                                                                                      |
| 6-Demethoxytangeritin                  | <i>Citrus reticulata</i>                                                                                                                                      |
| Tetramethylscutellarein                | <i>Citrus reticulata</i>                                                                                                                                      |
| Apigenin 7-rutinoside                  | <i>Citrus aurantium</i>                                                                                                                                       |
| Caryophyllene oxide                    | <i>Houttuynia emeiensis</i>                                                                                                                                   |
| Capillaridin E                         | <i>Artemisia annua</i> ; <i>Rhaponticum carthamoides</i>                                                                                                      |
| Limonene                               | <i>Artemisia annua</i> ; <i>Artemisia capillaris</i> ; <i>Artemisia annua L.cultivar Jwarharti</i>                                                            |
| Cyclosativene                          | <i>Artemisia annua</i>                                                                                                                                        |
| 2-Nonanone                             | <i>Artemisia annua</i>                                                                                                                                        |
| Kaempferol                             | <i>Artemisia capillaris</i> ; <i>Sedum sarmentosum</i> ; <i>Medicago sativa</i> ; <i>Cryptomeria japonica</i>                                                 |
| Salicylic acid                         | <i>Artemisia capillaris</i>                                                                                                                                   |
| Apigenin                               | <i>Artemisia capillaris</i>                                                                                                                                   |
| Octanal                                | <i>Artemisia capillaris</i>                                                                                                                                   |
| Rhamnocitrin                           | <i>Rhaponticum carthamoides</i>                                                                                                                               |
| Genkwanin                              | <i>Rhaponticum carthamoides</i>                                                                                                                               |
| p-Cymene                               | <i>Rhaponticum carthamoides</i>                                                                                                                               |
| Hexahydrofarnesyl acetone              | <i>Artemisia annua L.cultivar Jwarharti</i>                                                                                                                   |

|                                               |                                                                             |
|-----------------------------------------------|-----------------------------------------------------------------------------|
| Caprylic acid                                 | <i>Centaurea sessilis</i>                                                   |
| Isophytol                                     | <i>Centaurea sessilis; Anthemis aciphylla</i>                               |
| Phytol                                        | <i>Centaurea sessilis; Anthemis aciphylla</i>                               |
| Bicyclogermacren                              | <i>Centaurea sessilis</i>                                                   |
| (2E)-Octenal                                  | <i>Centaurea sessilis</i>                                                   |
| R-(+)-trans-Verbenol                          | <i>Centaurea sessilis</i>                                                   |
| 2-Pentylfuran                                 | <i>Anthemis aciphylla</i>                                                   |
| Isovaleraldehyde                              | <i>Alphina galanga</i>                                                      |
| alpha-Thujene                                 | <i>Leptospermum scoparium</i>                                               |
| Neryl acetate                                 | <i>Leptospermum scoparium</i>                                               |
| 6,9-Guaiadiene                                | <i>Piper arboreum</i>                                                       |
| Geraniol                                      | <i>Piper arboreum</i>                                                       |
| Germacrene D                                  | <i>Piper fimbriatum</i>                                                     |
| Ampelopsin 7-glucoside                        | <i>Pseudotsuga menziesii</i>                                                |
| Indole-3-carboxylic acid                      | <i>Pseudotsuga menziesii; Picea abies; Lycopersicon esculentum</i>          |
| Gibberellin A9                                | <i>Pinus sylvestris; Lathyrus odoratus; Brassica napus; Hordeum vulgare</i> |
| Gibberellin A1                                | <i>Pinus sylvestris; Lycopersicon esculentum; Lupinus luteus</i>            |
| Gibberellin A7                                | <i>Pinus sylvestris</i>                                                     |
| Indole-3-acetic acid                          | <i>Pinus sylvestris; Brassica rapa</i>                                      |
| Methyl indole-3-acetate                       | <i>Pinus sylvestris</i>                                                     |
| Syringetin 3-(6"-acetylglucoside)             | <i>Pinus sylvestris</i>                                                     |
| Laricitrin 3-(6"-acetylglucoside)             | <i>Pinus sylvestris</i>                                                     |
| Taxifolin 3'-glucoside                        | <i>Picea abies</i>                                                          |
| Isorhamnetin<br>3-(6"-<br>acetylgalactoside)  | <i>Picea abies</i>                                                          |
| Gibberellin A20                               | <i>Prunus persica; Lycopersicon esculentum</i>                              |
| Afzelechin                                    | <i>Prunus avium</i>                                                         |
| Gibberellin A44                               | <i>Prunus avium; Hordeum vulgare</i>                                        |
| Gibberellin A30                               | <i>Prunus avium</i>                                                         |
| Chrysin                                       | <i>Prunus avium</i>                                                         |
| Peonidin 3-rhamnoside                         | <i>Pisum sativum</i>                                                        |
| Gibberellin A97                               | <i>Lathyrus odoratus; Zea mays; Oryza sativa</i>                            |
| Gibberellin A51                               | <i>Lathyrus odoratus; Hordeum vulgare</i>                                   |
| Gibberellin A12                               | <i>Lathyrus odoratus; Triticum aestivum; Brassica napus</i>                 |
| Gibberellin A24                               | <i>Lathyrus odoratus; Brassica napus; Hordeum vulgare</i>                   |
| Gibberellin A44                               | <i>Lathyrus odoratus</i>                                                    |
| Isosojagol                                    | <i>Phaseolus lunatus</i>                                                    |
| Isoferreirin                                  | <i>Phaseolus lunatus; Phaseolus vulgaris</i>                                |
| 7,4'-Dihydroxy-5,2'-<br>dimethoxyisoflavanone | <i>Phaseolus lunatus; Phaseolus vulgaris</i>                                |
| 5-Deoxykievitol                               | <i>Phaseolus vulgaris</i>                                                   |

|                           |                                                                                                                                                                                |
|---------------------------|--------------------------------------------------------------------------------------------------------------------------------------------------------------------------------|
| (-)-Glycinol              | <i>Phaseolus vulgaris</i>                                                                                                                                                      |
| Psoralidin                | <i>Phaseolus coccineus</i>                                                                                                                                                     |
| Gibberellin A19           | <i>Phaseolus coccineus</i> ; <i>Lycopersicon esculentum</i>                                                                                                                    |
| Gibberellin A37           | <i>Phaseolus coccineus</i>                                                                                                                                                     |
| Gibberellin A14           | <i>Triticum aestivum</i>                                                                                                                                                       |
| Gibberellin A25           | <i>Zea mays</i> ; <i>Brassica napus</i>                                                                                                                                        |
| Neoglucobrassicin         | <i>Raphanus sativus</i> ; <i>Armoracia lapathifolia</i>                                                                                                                        |
| Gibberellin A53           | <i>Raphanus sativus</i>                                                                                                                                                        |
| Gibberellin A40           | <i>Brassica napus</i>                                                                                                                                                          |
| Gibberellin A34           | <i>Hordeum vulgare</i>                                                                                                                                                         |
| Gibberellin A8            | <i>Oryza sativa</i>                                                                                                                                                            |
| Fisetin 3-methyl ether    | <i>Robinia pseudoacacia</i>                                                                                                                                                    |
| Garbanzol                 | <i>Robinia pseudoacacia</i>                                                                                                                                                    |
| Butin                     | <i>Robinia pseudoacacia</i>                                                                                                                                                    |
| Gallocatechin             | <i>Colophospermum mopane</i>                                                                                                                                                   |
| (+)-Gallocatechin         | <i>Colophospermum mopane</i>                                                                                                                                                   |
| Dihydrorobinetin          | <i>Acacia mearnsii</i>                                                                                                                                                         |
| Dihydroquercetin          | <i>Acacia mearnsii</i>                                                                                                                                                         |
| Liquiritigenin            | <i>Acacia mearnsii</i>                                                                                                                                                         |
| (-)-Epicatechin           | <i>Acacia mearnsii</i>                                                                                                                                                         |
| ent-Epifisetinidol        | <i>Acacia mearnsii</i>                                                                                                                                                         |
| Kaempferide               | <i>Rhodiola sachalinensis</i> ; <i>Sinocrassula indica</i>                                                                                                                     |
| Sinocrassoside C1         | <i>Rhodiola sachalinensis</i>                                                                                                                                                  |
| Rhodionin                 | <i>Sinocrassula indica</i>                                                                                                                                                     |
| Rhodosin                  | <i>Sinocrassula indica</i>                                                                                                                                                     |
| Nicotinic acid            | <i>Lycopersicon esculentum</i>                                                                                                                                                 |
| 9-Ribosyl-cis-zeatin      | <i>Lycopersicon esculentum</i>                                                                                                                                                 |
| Indole-3-acetonitrile     | <i>Nicotiana tabacum</i> ; <i>Solanum tuberosum</i>                                                                                                                            |
| Trigonelline              | <i>Nicotiana tabacum</i>                                                                                                                                                       |
| Phytuberin                | <i>Nicotiana tabacum</i>                                                                                                                                                       |
| (-)-Phytuberin            | <i>Nicotiana tabacum</i>                                                                                                                                                       |
| 1-Caffeoyl-beta-D-glucose | <i>Nicotiana tabacum</i>                                                                                                                                                       |
| Desacetylphytuberin       | <i>Solanum tuberosum</i>                                                                                                                                                       |
| 9-Ribosyl-trans-zeatin    | <i>Solanum tuberosum</i>                                                                                                                                                       |
| Prunetin                  | <i>Glycyrrhiza uralensis</i> ; <i>Medicago sativa</i> ; <i>Clitoria ternatea</i> ; <i>Melilotus messanensis</i> ; <i>Glycyrrhiza pallidiflora</i> ; <i>Dalbergia odorifera</i> |
| Licoisoflavone A          | <i>Glycyrrhiza uralensis</i> ; <i>Glycyrrhiza inflata</i>                                                                                                                      |
| Glabridin                 | <i>Glycyrrhiza uralensis</i>                                                                                                                                                   |
| Topazolin                 | <i>Glycyrrhiza uralensis</i>                                                                                                                                                   |
| Isoderrone                | <i>Glycyrrhiza uralensis</i> ; <i>Glycyrrhiza aspera</i>                                                                                                                       |
| Licoflavone B             | <i>Glycyrrhiza uralensis</i>                                                                                                                                                   |

|                           |                                                                                                                                 |
|---------------------------|---------------------------------------------------------------------------------------------------------------------------------|
| 3'-Dimethylallylkievitone | <i>Glycyrrhiza uralensis</i>                                                                                                    |
| Wighteone                 | <i>Glycyrrhiza uralensis; Glycyrrhiza aspera; Lupinus luteus; Derris scandens</i>                                               |
| Hydroxywighteone          | <i>Glycyrrhiza uralensis; Glycyrrhiza aspera; Lupinus albus; Erythrina variegata</i>                                            |
| Licopyranocoumarin        | <i>Glycyrrhiza aspera; Glycyrrhiza inflata</i>                                                                                  |
| Kanzonol W                | <i>Glycyrrhiza aspera</i>                                                                                                       |
| Licuroside                | <i>Glycyrrhiza aspera; Glycyrrhiza inflata</i>                                                                                  |
| Neoisoliquiritigenin      | <i>Glycyrrhiza aspera; Glycyrrhiza inflata</i>                                                                                  |
| 1-O-Methylglycyrol        | <i>Glycyrrhiza aspera; Glycyrrhiza glabra</i>                                                                                   |
| Kanzonol P                | <i>Glycyrrhiza aspera; Glycyrrhiza glabra</i>                                                                                   |
| Neoliquiritin             | <i>Glycyrrhiza aspera; Glycyrrhiza glabra; Glycyrrhiza inflata</i>                                                              |
| Licoricone                | <i>Glycyrrhiza aspera; Glycyrrhiza glabra; Glycyrrhiza inflata</i>                                                              |
| Licicesaponin A3          | <i>Glycyrrhiza aspera; Glycyrrhiza glabra</i>                                                                                   |
| Licicesaponin G2          | <i>Glycyrrhiza aspera; Glycyrrhiza glabra</i>                                                                                   |
| Licicesaponin C2          | <i>Glycyrrhiza aspera; Glycyrrhiza glabra; Glycyrrhiza inflata</i>                                                              |
| Licicesaponin E2          | <i>Glycyrrhiza aspera; Glycyrrhiza glabra; Glycyrrhiza inflata</i>                                                              |
| Licoflavonol              | <i>Glycyrrhiza aspera</i>                                                                                                       |
| Gancaonin Q               | <i>Glycyrrhiza aspera; Glycyrrhiza inflata</i>                                                                                  |
| Glisoflavanone            | <i>Glycyrrhiza aspera</i>                                                                                                       |
| Kanzonol I                | <i>Glycyrrhiza aspera; Glycyrrhiza glabra</i>                                                                                   |
| Glycyrrhizol A            | <i>Glycyrrhiza aspera</i>                                                                                                       |
| Licoriphenone             | <i>Glycyrrhiza aspera</i>                                                                                                       |
| Licofuranocoumarin        | <i>Glycyrrhiza glabra; Glycyrrhiza inflata</i>                                                                                  |
| Glyasperin L              | <i>Glycyrrhiza glabra; Glycyrrhiza inflata</i>                                                                                  |
| Licocoumarone             | <i>Glycyrrhiza glabra; Glycyrrhiza inflata</i>                                                                                  |
| Glyinflanin E             | <i>Glycyrrhiza glabra</i>                                                                                                       |
| Glyinflanin F             | <i>Glycyrrhiza glabra</i>                                                                                                       |
| Gancaonin A               | <i>Glycyrrhiza glabra</i>                                                                                                       |
| Semilicoisoflavone B      | <i>Glycyrrhiza inflata</i>                                                                                                      |
| Licoagrochalcone D        | <i>Glycyrrhiza inflata</i>                                                                                                      |
| Pratensol                 | <i>Lupinus luteus; Derris scandens; Clitoria ternatea; Melilotus messanensis; Glycyrrhiza pallidiflora; Dalbergia odorifera</i> |
| Indicanin E               | <i>Lupinus luteus; Lupinus albus; Derris scandens</i>                                                                           |
| Derrisoflavone B          | <i>Lupinus luteus; Lupinus albus</i>                                                                                            |
| Lupinisol A               | <i>Lupinus luteus</i>                                                                                                           |
| Lupalbigenin              | <i>Lupinus luteus</i>                                                                                                           |
| Derrisoflavone F          | <i>Lupinus luteus; Lupinus albus</i>                                                                                            |
| Lupinalbin B              | <i>Lupinus luteus</i>                                                                                                           |
| Lupinalbin G              | <i>Lupinus luteus</i>                                                                                                           |
| Laburnetin                | <i>Lupinus luteus; Lupinus albus</i>                                                                                            |
| 3'-Methylorobol           | <i>Lupinus luteus; Lupinus albus</i>                                                                                            |
| Genistein                 | <i>Lupinus albus; Melilotus messanensis; Glycyrrhiza pallidiflora; Dalbergia odorifera</i>                                      |

|                            |                                                                                                                    |
|----------------------------|--------------------------------------------------------------------------------------------------------------------|
| Isoprunetin                | <i>Lupinus albus; Derris scandens</i>                                                                              |
| Scanderone                 | <i>Lupinus albus</i>                                                                                               |
| Chandalone                 | <i>Lupinus albus</i>                                                                                               |
| Ulexone A                  | <i>Lupinus albus</i>                                                                                               |
| Isolupalbigenin            | <i>Lupinus albus; Derris scandens</i>                                                                              |
| Gibberellin A18            | <i>Lupinus albus</i>                                                                                               |
| Gibberellin A23            | <i>Lupinus albus</i>                                                                                               |
| Lupinol C                  | <i>Lupinus albus</i>                                                                                               |
| Scandalenol                | <i>Lupinus albus; Erythrina variegata</i>                                                                          |
| Lupisoflavone              | <i>Derris scandens</i>                                                                                             |
| Alpinumisoflavone          | <i>Derris scandens</i>                                                                                             |
| Derrone                    | <i>Derris scandens; Erythrina variegata</i>                                                                        |
| Angustone B                | <i>Derris scandens</i>                                                                                             |
| Angustone C                | <i>Derris scandens</i>                                                                                             |
| Lupinisolone A             | <i>Derris scandens</i>                                                                                             |
| Lupinisoflavone H          | <i>Derris scandens</i>                                                                                             |
| Lupinifolin                | <i>Derris scandens</i>                                                                                             |
| Barpisoiflavone C          | <i>Erythrina variegata</i>                                                                                         |
| Erysenegalensein K         | <i>Erythrina variegata</i>                                                                                         |
| 8-Prenylluteone            | <i>Erythrina variegata</i>                                                                                         |
| Robustic acid              | <i>Erythrina variegata; Erythrina senegalensis</i>                                                                 |
| Eturunagarone              | <i>Erythrina variegata; Erythrina senegalensis</i>                                                                 |
| Bidwillon B                | <i>Erythrina senegalensis</i>                                                                                      |
| Lonchocarpic acid          | <i>Erythrina senegalensis</i>                                                                                      |
| Lonchocarpenin             | <i>Erythrina senegalensis</i>                                                                                      |
| Scandenin                  | <i>Erythrina senegalensis</i>                                                                                      |
| Euchretin E                | <i>Euchresta japonica</i>                                                                                          |
| Euchretin D                | <i>Euchresta japonica</i>                                                                                          |
| Euchretin M                | <i>Euchresta japonica</i>                                                                                          |
| Cytisine                   | <i>Euchresta japonica; Sophora flavescens; Maackia amurensis</i>                                                   |
| Formononetin               | <i>Euchresta formosana</i>                                                                                         |
| Secundiflorol I            | <i>Euchresta formosana; Sophora flavescens; Maackia amurensis</i>                                                  |
| Kushenin                   | <i>Euchresta formosana; Maackia amurensis; Sophora secundiflora; Sophora japonica; Glycyrrhiza pallidiflora</i>    |
| Euchrenone a4              | <i>Euchresta formosana</i>                                                                                         |
| Amorilin                   | <i>Euchresta formosana</i>                                                                                         |
| (-)-N-Methyleytisine       | <i>Euchresta formosana</i>                                                                                         |
| Daidzein                   | <i>Sophora flavescens; Maackia amurensis; Melilotus messanensis; Glycyrrhiza pallidiflora; Dalbergia odorifera</i> |
| Thermopsine                | <i>Sophora flavescens; Maackia amurensis</i>                                                                       |
| (-)-6alpha-Hydroxylupanine | <i>Sophora flavescens; Sophora secundiflora</i>                                                                    |



|                                  |                                                                                                                                                  |
|----------------------------------|--------------------------------------------------------------------------------------------------------------------------------------------------|
| (-)-6alpha-methoxylupanine       | <i>Sophora flavescens</i> ; <i>Sophora secundiflora</i>                                                                                          |
| Pratensein                       | <i>Maackia amurensis</i>                                                                                                                         |
| Mamanine                         | <i>Maackia amurensis</i> ; <i>Sophora secundiflora</i>                                                                                           |
| 5,6-Dehydrolupanine              | <i>Maackia amurensis</i>                                                                                                                         |
| Argentine                        | <i>Maackia amurensis</i>                                                                                                                         |
| Maackiain                        | <i>Sophora secundiflora</i>                                                                                                                      |
| (-)-12,12'-Methylenedicytisine   | <i>Sophora secundiflora</i>                                                                                                                      |
| Soyasapogenol E                  | <i>Medicago sativa</i> ; <i>Trifolium pratense</i>                                                                                               |
| Xenognosin B                     | <i>Medicago sativa</i> ; <i>Clitoria ternatea</i> ; <i>Trifolium pratense</i> ; <i>Sophora japonica</i> ; <i>Melilotus messanensis</i>           |
| Vestitone                        | <i>Medicago sativa</i>                                                                                                                           |
| Anhydroglycinol                  | <i>Medicago sativa</i> ; <i>Trifolium pratense</i> ; <i>Melilotus messanensis</i>                                                                |
| Lespedezol A1                    | <i>Medicago sativa</i> ; <i>Trifolium pratense</i> ; <i>Melilotus messanensis</i>                                                                |
| 6a-Hydroxymedicarpin             | <i>Medicago sativa</i> ; <i>Glycyrrhiza pallidiflora</i> ; <i>Dalbergia odorifera</i>                                                            |
| Sophorophenolone                 | <i>Medicago sativa</i>                                                                                                                           |
| Delphinidine                     | <i>Medicago sativa</i> ; <i>Trifolium pratense</i> ; <i>Sophora japonica</i> ; <i>Melilotus messanensis</i>                                      |
| Quercetin                        | <i>Medicago sativa</i> ; <i>Clitoria ternatea</i> ; <i>Melilotus messanensis</i>                                                                 |
| Lespedezol G1                    | <i>Medicago sativa</i>                                                                                                                           |
| Licoagroside C                   | <i>Medicago sativa</i>                                                                                                                           |
| Pratol                           | <i>Medicago sativa</i> ; <i>Glycyrrhiza pallidiflora</i>                                                                                         |
| Licoagroside E                   | <i>Medicago sativa</i>                                                                                                                           |
| 7,4'-Di-O-methylaidizein         | <i>Medicago sativa</i> ; <i>Trifolium pratense</i> ; <i>Melilotus messanensis</i> ; <i>Glycyrrhiza pallidiflora</i> ; <i>Dalbergia odorifera</i> |
| Licodione 2'-methyl ether        | <i>Medicago sativa</i>                                                                                                                           |
| Tricin                           | <i>Clitoria ternatea</i> ; <i>Trifolium pratense</i>                                                                                             |
| Myricetin                        | <i>Clitoria ternatea</i> ; <i>Trifolium pratense</i> ; <i>Sophora japonica</i>                                                                   |
| Irisolidone                      | <i>Trifolium pratense</i> ; <i>Glycyrrhiza pallidiflora</i>                                                                                      |
| Erythrinin C                     | <i>Trifolium pratense</i> ; <i>Sophora japonica</i>                                                                                              |
| Licoagroisoflavone               | <i>Trifolium pratense</i> ; <i>Sophora japonica</i>                                                                                              |
| Kushenin                         | <i>Trifolium pratense</i>                                                                                                                        |
| Tectoridin                       | <i>Trifolium pratense</i>                                                                                                                        |
| Sophojaponicin                   | <i>Trifolium pratense</i> ; <i>Glycyrrhiza pallidiflora</i>                                                                                      |
| 7,3'-Dimethylorobol              | <i>Trifolium pratense</i>                                                                                                                        |
| Irisolidone 7-O-beta-D-glucoside | <i>Trifolium pratense</i>                                                                                                                        |
| (-)-Maackiain                    | <i>Trifolium pratense</i> ; <i>Lespedeza homoloba</i>                                                                                            |
| Irilone                          | <i>Sophora japonica</i> ; <i>Glycyrrhiza pallidiflora</i>                                                                                        |
| Isokaempferide                   | <i>Sophora japonica</i>                                                                                                                          |
| Trifoliol                        | <i>Sophora japonica</i>                                                                                                                          |
| Trifolirhizin                    | <i>Sophora japonica</i>                                                                                                                          |
| Irilone 4'-O-glucoside           | <i>Sophora japonica</i>                                                                                                                          |
| (+)-6a-Hydroxymaackiain          | <i>Sophora japonica</i> ; <i>Lespedeza homoloba</i> ; <i>Glycyrrhiza pallidiflora</i>                                                            |

|                             |                                                                     |
|-----------------------------|---------------------------------------------------------------------|
| Coumestrol                  | <i>Lespedeza homoloba</i>                                           |
| Bolusanthin III             | <i>Lespedeza homoloba</i>                                           |
| 9-O-Methylcoumestrol        | <i>Lespedeza homoloba</i>                                           |
| 5'-Methoxysativan           | <i>Lespedeza homoloba</i>                                           |
| Sativanone                  | <i>Melilotus messanensis</i>                                        |
| 2-Methoxymedicarpin         | <i>Melilotus messanensis</i>                                        |
| Coumestrin                  | <i>Glycyrrhiza pallidiflora</i>                                     |
| Haginin D                   | <i>Glycyrrhiza pallidiflora</i>                                     |
| Lespedezol F1               | <i>Glycyrrhiza pallidiflora</i>                                     |
| 2'-Methoxyisoliquiritigenin | <i>Glycyrrhiza pallidiflora</i>                                     |
| Echinatin                   | <i>Dalbergia odorifera</i>                                          |
| Glypallichalcone            | <i>Dalbergia odorifera</i>                                          |
| Melilotocarpan B            | <i>Dalbergia odorifera</i>                                          |
| Cryptopine                  | <i>Corydalis claviculata; Corydalis solida</i>                      |
| Allocryptopine              | <i>Corydalis claviculata; Papaver somniferum</i>                    |
| Rhoeadine                   | <i>Corydalis claviculata</i>                                        |
| Norribasine                 | <i>Papaver somniferum</i>                                           |
| Ribasine                    | <i>Papaver somniferum</i>                                           |
| Sinoacutine                 | <i>Papaver somniferum</i>                                           |
| alpha-Hydrastine            | <i>Papaver somniferum</i>                                           |
| Noscapine                   | <i>Corydalis solida</i>                                             |
| Narcotoline                 | <i>Corydalis solida</i>                                             |
| Salutaridine                | <i>Corydalis solida</i>                                             |
| Oxocularicine               | <i>Corydalis solida</i>                                             |
| Glaziovine                  | <i>Annona cherimola; Cocculus laurifolius; Artabotrys uncinatus</i> |
| Calycinine                  | <i>Annona cherimola</i>                                             |
| Juzirine                    | <i>Annona cherimola</i>                                             |
| Pronuciferine               | <i>Xylopiya parviflora; Stephania cepharantha Hayata</i>            |
| Annocherine A               | <i>Xylopiya parviflora</i>                                          |
| Annocherine B               | <i>Xylopiya parviflora</i>                                          |
| Michelalbine                | <i>Xylopiya parviflora</i>                                          |
| Micheline A                 | <i>Xylopiya parviflora</i>                                          |
| 14-Episinomenine            | <i>Cocculus laurifolius; Stephania cepharantha</i>                  |
| Cephamonine                 | <i>Stephania cepharantha</i>                                        |
| Aknadilactam                | <i>Stephania cepharantha</i>                                        |
| Stephodeline                | <i>Stephania cepharantha</i>                                        |
| Tannagine                   | <i>Stephania cepharantha</i>                                        |
| Aknadinine                  | <i>Stephania cepharantha</i>                                        |
| Juziphine                   | <i>Stephania cepharantha</i>                                        |
| N-Methylasimilobine         | <i>Stephania cepharantha</i>                                        |
| Coclaurine                  | <i>Stephania cepharantha Hayata</i>                                 |

|                               |                                                                                   |
|-------------------------------|-----------------------------------------------------------------------------------|
| Anonaine                      | <i>Stephania cepharantha</i> Hayata                                               |
| Aknadicine                    | <i>Stephania cepharantha</i> Hayata                                               |
| Cucoline                      | <i>Stephania cepharantha</i> Hayata                                               |
| Oblongine                     | <i>Stephania cepharantha</i> Hayata                                               |
| 1-Methoxybrassinin            | <i>Brassica oleracea</i>                                                          |
| Glucoviorylin                 | <i>Brassica oleracea</i> ; <i>Brassica rapa</i> ; <i>Hesperis matronalis</i>      |
| Glucolepidiin                 | <i>Brassica oleracea</i> ; <i>Brassica rapa</i> ; <i>Hesperis matronalis</i>      |
| Caulilexin C                  | <i>Brassica oleracea</i>                                                          |
| Brassicinal B                 | <i>Brassica oleracea</i>                                                          |
| Benzylglucosinolate           | <i>Brassica oleracea</i> ; <i>Brassica rapa</i> ; <i>Hesperis matronalis</i>      |
| Glucocheirolin                | <i>Brassica oleracea</i> ; <i>Brassica rapa</i> ; <i>Hesperis matronalis</i>      |
| Spirobrassinin                | <i>Brassica oleracea</i>                                                          |
| 3-Hydroxybutyl glucosinolate  | <i>Brassica oleracea</i> ; <i>Brassica rapa</i> ; <i>Hesperis matronalis</i>      |
| 4-Methoxyglucobrassicin       | <i>Brassica oleracea</i>                                                          |
| Sinigrin                      | <i>Brassica rapa</i> ; <i>Hesperis matronalis</i>                                 |
| Methyl anthranilate           | <i>Brassica rapa</i>                                                              |
| Glucoberteroin                | <i>Brassica rapa</i>                                                              |
| 1-Methoxyspirobrassinin       | <i>Brassica rapa</i>                                                              |
| Glucosinalbate                | <i>Armoracia lapathifolia</i>                                                     |
| Glucosalysin                  | <i>Armoracia lapathifolia</i>                                                     |
| Glucohesperin                 | <i>Armoracia lapathifolia</i>                                                     |
| Glucouiberin                  | <i>Hesperis matronalis</i>                                                        |
| Glucobrassicinapin            | <i>Hesperis matronalis</i>                                                        |
| Glucosquereillin              | <i>Hesperis matronalis</i>                                                        |
| 2-Methoxybenzyl glucosinolate | <i>Hesperis matronalis</i>                                                        |
| Alstolactone                  | <i>Alstonia macrophylla</i>                                                       |
| Isoalstonisine                | <i>Alstonia macrophylla</i>                                                       |
| Normacusine B                 | <i>Alstonia macrophylla</i>                                                       |
| N(4)-Demethylalstonerinal     | <i>Alstonia macrophylla</i> ; <i>Alstonia angustifolia</i>                        |
| Cathafoline N(4)-oxide        | <i>Alstonia macrophylla</i>                                                       |
| Alstophyllal                  | <i>Alstonia angustifolia</i> ; <i>Alstonia angustifolia</i> var. <i>latifolia</i> |
| Macrocarpine A                | <i>Alstonia angustifolia</i> ; <i>Alstonia angustifolia</i> var. <i>latifolia</i> |
| Macrocarpine B                | <i>Alstonia angustifolia</i> ; <i>Alstonia angustifolia</i> var. <i>latifolia</i> |
| Alstohentine                  | <i>Alstonia angustifolia</i> ; <i>Alstonia angustifolia</i> var. <i>latifolia</i> |
| Alstonisine                   | <i>Alstonia angustifolia</i>                                                      |
| Alstomaline                   | <i>Alstonia angustifolia</i> ; <i>Alstonia angustifolia</i> var. <i>latifolia</i> |
| N1-Demethylalstophylline      | <i>Alstonia angustifolia</i> ; <i>Alstonia angustifolia</i> var. <i>latifolia</i> |
| (-)-Vincamajine               | <i>Alstonia angustifolia</i> var. <i>latifolia</i>                                |
| Isopongaflavone               | <i>Pongamia pinnata</i> ; <i>Tephrosia purpurea</i>                               |
| Pongaglabol methyl ether      | <i>Pongamia pinnata</i> ; <i>Tephrosia purpurea</i>                               |
| Kanjone                       | <i>Pongamia pinnata</i> ; <i>Tephrosia purpurea</i>                               |

|                          |                                               |
|--------------------------|-----------------------------------------------|
| Lanceolatin B            | <i>Pongamia pinnata</i>                       |
| Glabranin                | <i>Pongamia pinnata</i>                       |
| Purpurenone              | <i>Millettia pinnata</i>                      |
| O-Methylpongamol         | <i>Millettia pinnata</i>                      |
| Purpuritenin B           | <i>Millettia pinnata</i>                      |
| Pinnatin                 | <i>Millettia pinnata</i>                      |
| Piscisoflavone D         | <i>Millettia pinnata</i>                      |
| Praecansone B            | <i>Millettia pinnata</i>                      |
| Ovalichromene B          | <i>Millettia pinnata</i>                      |
| Piscisoflavone A         | <i>Neorautanenia amboensis</i>                |
| Millettone               | <i>Neorautanenia amboensis</i>                |
| Pongachalcone I          | <i>Tephrosia purpurea</i>                     |
| Pongapinnol D            | <i>Tephrosia purpurea</i>                     |
| Karanjachromene          | <i>Tephrosia purpurea</i>                     |
| Dihydroamorphigenin      | <i>Tephrosia purpurea; Piscidia erythrina</i> |
| Dalpanol                 | <i>Tephrosia purpurea; Piscidia erythrina</i> |
| Amorphigenol             | <i>Tephrosia purpurea; Piscidia erythrina</i> |
| Amorphigenin             | <i>Tephrosia purpurea; Piscidia erythrina</i> |
| Jamaicin                 | <i>Tephrosia purpurea; Amorpha fruticosa</i>  |
| Ichthyone                | <i>Tephrosia purpurea; Amorpha fruticosa</i>  |
| Dehydromillettone        | <i>Tephrosia purpurea; Amorpha fruticosa</i>  |
| 3-O-Demethylamorphigenin | <i>Tephrosia purpurea; Piscidia erythrina</i> |
| Rotenone                 | <i>Amorpha fruticosa</i>                      |
| Candidone                | <i>Piscidia erythrina</i>                     |
| Dehydrodeguelin          | <i>Piscidia erythrina</i>                     |
| Ambofuranol              | <i>Piscidia erythrina</i>                     |
| Neorautenanol            | <i>Piscidia erythrina</i>                     |
| Isopongachromene         | <i>Piscidia erythrina</i>                     |
| Blestrianol A            | <i>Gymnadenia conopsea</i>                    |
| Blestrin A               | <i>Gymnadenia conopsea</i>                    |
| Blestrin B               | <i>Gymnadenia conopsea</i>                    |
| Blestrin C               | <i>Gymnadenia conopsea</i>                    |
| Blestrin D               | <i>Gymnadenia conopsea</i>                    |
| Isoarundinin-II          | <i>Gymnadenia conopsea</i>                    |
| Bulbocodin C             | <i>Bletilla striata</i>                       |
| Bulbocodin D             | <i>Bletilla striata</i>                       |
| Gymconopin C             | <i>Bletilla striata</i>                       |
| Bulbocol                 | <i>Bletilla striata</i>                       |
| Gymconopin D             | <i>Bletilla striata</i>                       |
| 12-Methylferruginol      | <i>Taiwania cryptomerioides</i>               |
| Pisiferal                | <i>Taiwania cryptomerioides</i>               |

|                                |                                                       |
|--------------------------------|-------------------------------------------------------|
| (-)-Nortrachelogenin           | <i>Taiwania cryptomerioides; Cryptomeria japonica</i> |
| Matairesinol                   | <i>Chamaecyparis formosensis</i>                      |
| Cryptomeridiol                 | <i>Chamaecyparis formosensis</i>                      |
| Cubeb camphor                  | <i>Chamaecyparis formosensis</i>                      |
| Epicubebol                     | <i>Chamaecyparis formosensis</i>                      |
| Diphyllin                      | <i>Chamaecyparis formosensis</i>                      |
| Sandaracopimarinal             | <i>Chamaecyparis formosensis</i>                      |
| Sugiol                         | <i>Chamaecyparis formosensis</i>                      |
| 3,7,4'-Tri-O-methylkaempferol  | <i>Chamaecyparis formosensis</i>                      |
| 19-Hydroxyferruginol           | <i>Chamaecyparis formosensis</i>                      |
| Pisiferanol                    | <i>Cryptomeria japonica</i>                           |
| Pisiferol                      | <i>Cryptomeria japonica</i>                           |
| Chaenocephalol                 | <i>Cryptomeria japonica</i>                           |
| (-)-Pluviatolide               | <i>Cryptomeria japonica</i>                           |
| 12-O-Methylpisiferanol         | <i>Cryptomeria japonica</i>                           |
| alpha-Cadinol                  | <i>Cryptomeria japonica</i>                           |
| Sugiol methyl ether            | <i>Cryptomeria japonica</i>                           |
| (+)-beta-Cyclocostunolide      | <i>Artemisia spp.</i>                                 |
| Arbusculin C                   | <i>Saussurea lappa</i>                                |
| Nortetraphyllicine             | <i>Tabernaemontana coffeoides</i>                     |
| Vincamine                      | <i>Kopsia dasyrachis</i>                              |
| Ajmalicine                     | <i>Kopsia dasyrachis; Rauwolfia vomitoria</i>         |
| Sarpagine                      | <i>Catharanthus roseus</i>                            |
| Alstonine                      | <i>Catharanthus roseus</i>                            |
| (+)-Isoeburnamine              | <i>Catharanthus roseus</i>                            |
| (+)-Eburnamonine               | <i>Catharanthus roseus</i>                            |
| 14,15-Dihydroxyvincadifformine | <i>Catharanthus roseus</i>                            |
| Serpentine                     | <i>Rauwolfia vomitoria</i>                            |
| 10-O-Methylsarpagine           | <i>Rauwolfia vomitoria</i>                            |
| Dulcisxanthone B               | <i>Garcinia mangostana</i>                            |
| Cowaxanthone D                 | <i>Garcinia mangostana</i>                            |
| Isonormangostin                | <i>Garcinia mangostana</i>                            |
| Normangostin                   | <i>Garcinia dulcis</i>                                |
| Garcinone C                    | <i>Garcinia dulcis</i>                                |
| Mangostenone D                 | <i>Garcinia dulcis</i>                                |
| Mangostenone E                 | <i>Garcinia dulcis</i>                                |
| Tovophyllin B                  | <i>Garcinia dulcis</i>                                |
| Arborinine                     | <i>Severinia buxifolia</i>                            |
| Xanthoxyletin                  | <i>Ruta graveolens</i>                                |
| Clausamine A                   | <i>Ruta graveolens</i>                                |
| 1,2,3-Trihydroxyacridone       | <i>Ruta graveolens</i>                                |

|                            |                                                                                                               |
|----------------------------|---------------------------------------------------------------------------------------------------------------|
| Bergapten                  | <i>Clausena excavata</i>                                                                                      |
| Psoralen                   | <i>Clausena excavata</i>                                                                                      |
| Rutacridone                | <i>Clausena excavata</i>                                                                                      |
| Isoscopoletin              | <i>Zanthoxylum simulans</i>                                                                                   |
| N-Methylflindersine        | <i>Zanthoxylum simulans</i>                                                                                   |
| (-)-5-Methoxybalanophonin  | <i>Zanthoxylum simulans</i>                                                                                   |
| beta-Sitosterone           | <i>Zanthoxylum integrifoliolum</i>                                                                            |
| Sepesteonol                | <i>Zanthoxylum integrifoliolum</i>                                                                            |
| Zanthobungeanine           | <i>Zanthoxylum integrifoliolum</i>                                                                            |
| Flindersine                | <i>Zanthoxylum integrifoliolum</i>                                                                            |
| Scopoletin                 | <i>Broussonetia papyrifera</i>                                                                                |
| Sanggenon L                | <i>Broussonetia papyrifera</i>                                                                                |
| Gemichalcone B             | <i>Broussonetia papyrifera</i>                                                                                |
| Gemichalcone C             | <i>Broussonetia papyrifera</i>                                                                                |
| Artocommunol CA            | <i>Morus alba</i>                                                                                             |
| Artocommunol CE            | <i>Morus alba</i>                                                                                             |
| Marmesin                   | <i>Morus alba</i>                                                                                             |
| Dihydrocycloartomunin      | <i>Morus alba</i>                                                                                             |
| Dihydroisocycloartomunin   | <i>Morus alba</i>                                                                                             |
| Cycloartomunin             | <i>Morus alba</i>                                                                                             |
| Artochamin D               | <i>Morus alba</i>                                                                                             |
| Brousoflavonol A           | <i>Morus alba</i>                                                                                             |
| (-)-Cycloartocarpin        | <i>Morus alba</i>                                                                                             |
| Morusin                    | <i>Artocarpus communis</i>                                                                                    |
| Sanggenon M                | <i>Artocarpus communis</i>                                                                                    |
| Cyclomulberrin             | <i>Artocarpus communis</i>                                                                                    |
| Sanggenon A                | <i>Artocarpus communis</i>                                                                                    |
| Mulberrin                  | <i>Artocarpus communis</i>                                                                                    |
| Demethoxyisogemichalcone C | <i>Artocarpus communis</i>                                                                                    |
| Isogemichalcone C          | <i>Artocarpus communis</i>                                                                                    |
| Calystegin B2              | <i>Lycium chinense</i>                                                                                        |
| Atropine                   | <i>Lycium chinense</i>                                                                                        |
| Calystegine B4             | <i>Mandragora autumnalis</i>                                                                                  |
| Baccatin V                 | <i>Taxus cuspidata; Taxus brevifolia; Taxus wallichiana; Taxus chinensis; Taxus mairei; Taxus yunnanensis</i> |
| Taxol D                    | <i>Taxus cuspidata; Taxus chinensis; Taxus yunnanensis</i>                                                    |
| Dantaxusin D               | <i>Taxus cuspidata; Taxus baccata; Taxus chinensis; Taxus mairei</i>                                          |
| 9-Deacetyltaxininine       | <i>Taxus cuspidata; Taxus chinensis; Taxus mairei; Taxus yunnanensis</i>                                      |
| Taxchin B                  | <i>Taxus cuspidata; Taxus baccata; Taxus mairei; Taxus yunnanensis</i>                                        |
| Taxinine B                 | <i>Taxus cuspidata; Taxus chinensis</i>                                                                       |
| Taxine I                   | <i>Taxus cuspidata; Taxus chinensis</i>                                                                       |

|                                    |                                                                                                             |
|------------------------------------|-------------------------------------------------------------------------------------------------------------|
| Taxumairol A                       | <i>Taxus cuspidata; Taxus baccata; Taxus chinensis</i>                                                      |
| Taxchinin H                        | <i>Taxus cuspidata; Taxus brevifolia</i>                                                                    |
| Taxol B                            | <i>Taxus cuspidata</i>                                                                                      |
| Dantaxusin A                       | <i>Taxus cuspidata; Taxus baccata; Taxus chinensis; Taxus mairei</i>                                        |
| Taxayuntin E                       | <i>Taxus cuspidata; Taxus chinensis</i>                                                                     |
| Taxayuntin F                       | <i>Taxus cuspidata</i>                                                                                      |
| Taxchinin A                        | <i>Taxus cuspidata</i>                                                                                      |
| Taxchinin D                        | <i>Taxus cuspidata; Taxus baccata; Taxus wallichiana</i>                                                    |
| Taxchinin C                        | <i>Taxus cuspidata; Taxus brevifolia; Taxus yunnanensis</i>                                                 |
| Taxchinin K                        | <i>Taxus cuspidata; Taxus brevifolia; Taxus yunnanensis</i>                                                 |
| Taxayuntin H                       | <i>Taxus cuspidata; Taxus brevifolia; Taxus baccata; Taxus wallichiana; Taxus mairei</i>                    |
| Baccatin IV                        | <i>Taxus cuspidata; Taxus yunnanensis</i>                                                                   |
| Taxamairin B                       | <i>Taxus cuspidata</i>                                                                                      |
| Dantaxusin C                       | <i>Taxus cuspidata; Taxus baccata; Taxus mairei</i>                                                         |
| Taxinine A                         | <i>Taxus cuspidata</i>                                                                                      |
| 7-Deacetylcandensene               | <i>Taxus cuspidata; Taxus baccata</i>                                                                       |
| Chinentaxunine                     | <i>Taxus cuspidata</i>                                                                                      |
| N-Methyltaxol C                    | <i>Taxus cuspidata; Taxus chinensis; Taxus yunnanensis</i>                                                  |
| 14beta-benzoyloxybaccatin IV       | <i>Taxus cuspidata; Taxus baccata; Taxus mairei</i>                                                         |
| 5-Decinamoyltaxuspine D            | <i>Taxus cuspidata; Taxus yunnanensis</i>                                                                   |
| 5-Cinnamoyltaxicin I triacetate    | <i>Taxus cuspidata; Taxus chinensis; Taxus mairei; Taxus yunnanensis</i>                                    |
| 5-epi-Canadensene                  | <i>Taxus cuspidata; Taxus chinensis; Taxus mairei</i>                                                       |
| 7,2'-Bisdeacetoxyaustroscopicatine | <i>Taxus cuspidata</i>                                                                                      |
| Taxuspinanane I                    | <i>Taxus brevifolia; Taxus baccata; Taxus wallichiana; Taxus chinensis; Taxus mairei; Taxus yunnanensis</i> |
| Ormosin VI                         | <i>Taxus brevifolia; Taxus mairei</i>                                                                       |
| Taxchinin B                        | <i>Taxus brevifolia; Taxus wallichiana</i>                                                                  |
| Taxuspine V                        | <i>Taxus brevifolia; Taxus mairei</i>                                                                       |
| 14beta-Hydroxytaxusin              | <i>Taxus brevifolia; Taxus baccata; Taxus wallichiana</i>                                                   |
| Epitaxol                           | <i>Taxus baccata; Taxus wallichiana; Taxus chinensis; Taxus mairei; Taxus yunnanensis</i>                   |
| Taxachitriene A                    | <i>Taxus baccata</i>                                                                                        |
| Taxachitriene B                    | <i>Taxus baccata</i>                                                                                        |
| Taxuspine S                        | <i>Taxus baccata; Taxus chinensis; Taxus mairei</i>                                                         |
| Taxezopidine L                     | <i>Taxus baccata; Taxus mairei</i>                                                                          |
| Taxol C                            | <i>Taxus baccata</i>                                                                                        |
| Taxuspinanane A                    | <i>Taxus baccata; Taxus chinensis; Taxus yunnanensis</i>                                                    |
| Taxinine E                         | <i>Taxus baccata; Taxus chinensis</i>                                                                       |
| Taxuspine Z                        | <i>Taxus baccata; Taxus wallichiana</i>                                                                     |
| Taxezopidine E                     | <i>Taxus baccata</i>                                                                                        |
| Taxuspine X                        | <i>Taxus baccata</i>                                                                                        |
| Taxezopidine F                     | <i>Taxus baccata; Taxus yunnanensis</i>                                                                     |

|                                |                                                                 |
|--------------------------------|-----------------------------------------------------------------|
| Taxuyunnanine C                | <i>Taxus baccata</i>                                            |
| Taxuspinanane B                | <i>Taxus baccata; Taxus wallichiana; Taxus chinensis</i>        |
| Ponasterone A                  | <i>Taxus baccata; Taxus chinensis</i>                           |
| Decinnamoyltaxinine E          | <i>Taxus baccata</i>                                            |
| Taxezopidine H                 | <i>Taxus baccata; Taxus mairei</i>                              |
| Taxuspine D                    | <i>Taxus baccata; Taxus mairei</i>                              |
| Taxin B                        | <i>Taxus baccata</i>                                            |
| Taxuspine U                    | <i>Taxus baccata; Taxus mairei</i>                              |
| 5-Deacetyltaxachitriene B      | <i>Taxus baccata</i>                                            |
| 2-Deacetyltaxachitriene A      | <i>Taxus baccata</i>                                            |
| Taxuspine A                    | <i>Taxus wallichiana; Taxus chinensis</i>                       |
| Taxuspine P                    | <i>Taxus wallichiana; Taxus yunnanensis</i>                     |
| Isolariciresinol               | <i>Taxus wallichiana; Taxus yunnanensis</i>                     |
| Taxuspine T                    | <i>Taxus chinensis; Taxus mairei</i>                            |
| Taxine II                      | <i>Taxus chinensis</i>                                          |
| Taxuspine B                    | <i>Taxus chinensis; Taxus mairei</i>                            |
| Taxuspine E                    | <i>Taxus chinensis; Taxus yunnanensis</i>                       |
| Taxayuntin J                   | <i>Taxus chinensis; Taxus mairei</i>                            |
| Taxumairol F                   | <i>Taxus chinensis; Taxus yunnanensis</i>                       |
| Deaminoacyltaxine A            | <i>Taxus chinensis; Taxus mairei; Taxus yunnanensis</i>         |
| Isotaxine B                    | <i>Taxus chinensis; Taxus yunnanensis</i>                       |
| Taxinine H                     | <i>Taxus chinensis; Taxus mairei</i>                            |
| Dantaxusin B                   | <i>Taxus chinensis; Taxus mairei</i>                            |
| Taxayuntin A                   | <i>Taxus chinensis</i>                                          |
| 2-Deacetyldecinamoyltaxinine E | <i>Taxus chinensis; Taxus mairei</i>                            |
| Taxuyunnanine N                | <i>Taxus mairei</i>                                             |
| 10-Deacetyltaxol A             | <i>Taxus mairei</i>                                             |
| 13-Deacetoxybaccatin I         | <i>Taxus mairei; Taxus yunnanensis</i>                          |
| Taxumairol V                   | <i>Taxus yunnanensis</i>                                        |
| Taxchinin I                    | <i>Taxus yunnanensis</i>                                        |
| Methyl pyroglutamate           | <i>Panax notoginseng</i>                                        |
| Ginsenoside Rh7                | <i>Panax notoginseng; Panax pseudo-ginseng var. notoginseng</i> |
| Ginsenoyne E                   | <i>Panax ginseng; Panax pseudo-ginseng var. notoginseng</i>     |
| Notoginsenoside                | <i>Panax ginseng</i>                                            |
| Panaxydol                      | <i>Panax pseudo-ginseng var. notoginseng</i>                    |
| Ginsenoside Re                 | <i>Panax pseudo-ginseng var. notoginseng</i>                    |
| Aristolactam IIIa              | <i>Aristolochia elegans</i>                                     |
| Aristolochate I                | <i>Aristolochia elegans</i>                                     |
| Aristolactam I                 | <i>Aristolochia elegans</i>                                     |
| Methyl aristolochate           | <i>Aristolochia elegans</i>                                     |
| Aristolochate C                | <i>Aristolochia elegans</i>                                     |



|                       |                                  |
|-----------------------|----------------------------------|
| Aristolochic acid I   | <i>Aristolochia heterophylla</i> |
| 4-Hydroxybenzoic acid | <i>Aristolochia heterophylla</i> |
| O-Methylflavinantine  | <i>Artabotrys uncinatus</i>      |
| Pallidine             | <i>Artabotrys uncinatus</i>      |
| Norpallidine          | <i>Artabotrys uncinatus</i>      |
| Lysicamine            | <i>Artabotrys uncinatus</i>      |
| Flavinantine          | <i>Annona purpurea</i>           |
